# Supplementary material
Source: PubMed Central journal article supplement (PMC2821149)
Supplement: Supp_Data.pdf [file Supp_Data.pdf]

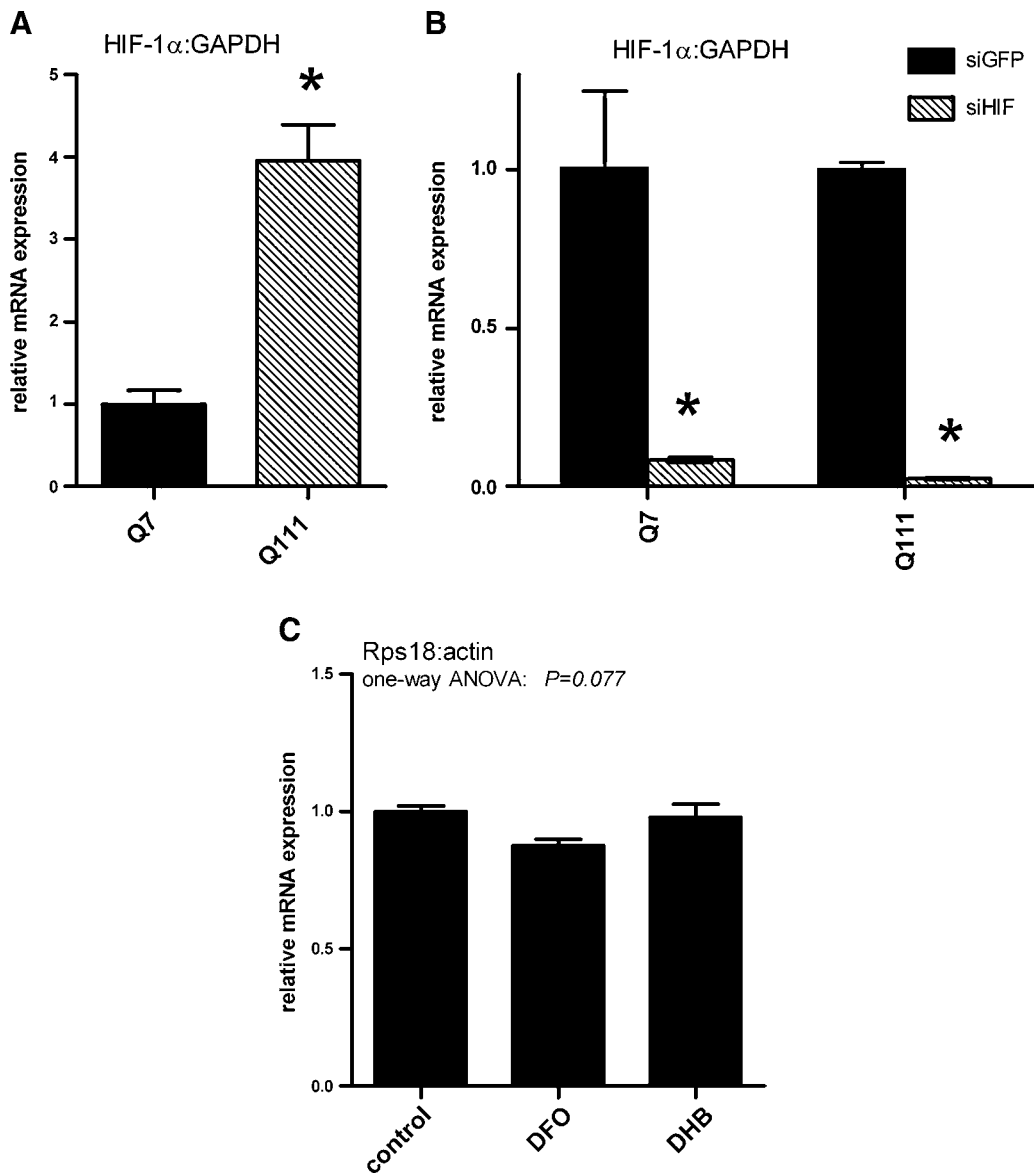

**SUPPLEMENTAL FIG. 1.** (A) TaqMan real-time gene expression assays for HIF-1 $\alpha$  show increased basal HIF-1 $\alpha$  expression in mutant huntingtin (Q111) cells compared to wild-type (Q7) striatal cells. Gene expression levels were normalized to GAPDH levels and are expressed as fold increase over Q7 cells. Data represent mean  $\pm$  SEM of three independent experiments. \* $p < 0.05$ , Student's *t*-test. (B) Q7 and Q111 striatal cells were transduced with a retrovirus delivering hp/GFP (siGFP) or hp/HIF-1 $\alpha$  (siHIF-1). HIF-1 $\alpha$  expression levels were determined by RT-PCR and were significantly reduced in siHIF cells of either genotype. Gene expression levels were normalized to GAPDH levels and are expressed as fraction of Q7 cells. Data represent mean  $\pm$  SEM of two independent experiments. \* $p < 0.05$ , Student's *t*-test. (C) Cortical neuron cultures were treated with PHD inhibitors for 24 h and assayed the expression of ribosomal protein s18 (Rps18) and actin. Treatment with PHD inhibitors did not change actin levels when normalized to Rps18.

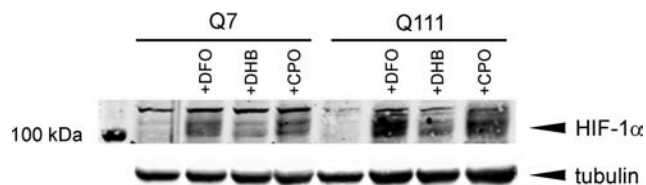

**SUPPLEMENTAL FIG. 2.** Structurally diverse HIF PHD inhibitors stabilize HIF-1 $\alpha$  protein. HIF-1 $\alpha$  protein levels in Q7 and Q111 cells were determined by Western blot analysis following treatment with DFO, DHB, or CPO. All three compounds increased levels of HIF-1 $\alpha$  in both cell types.

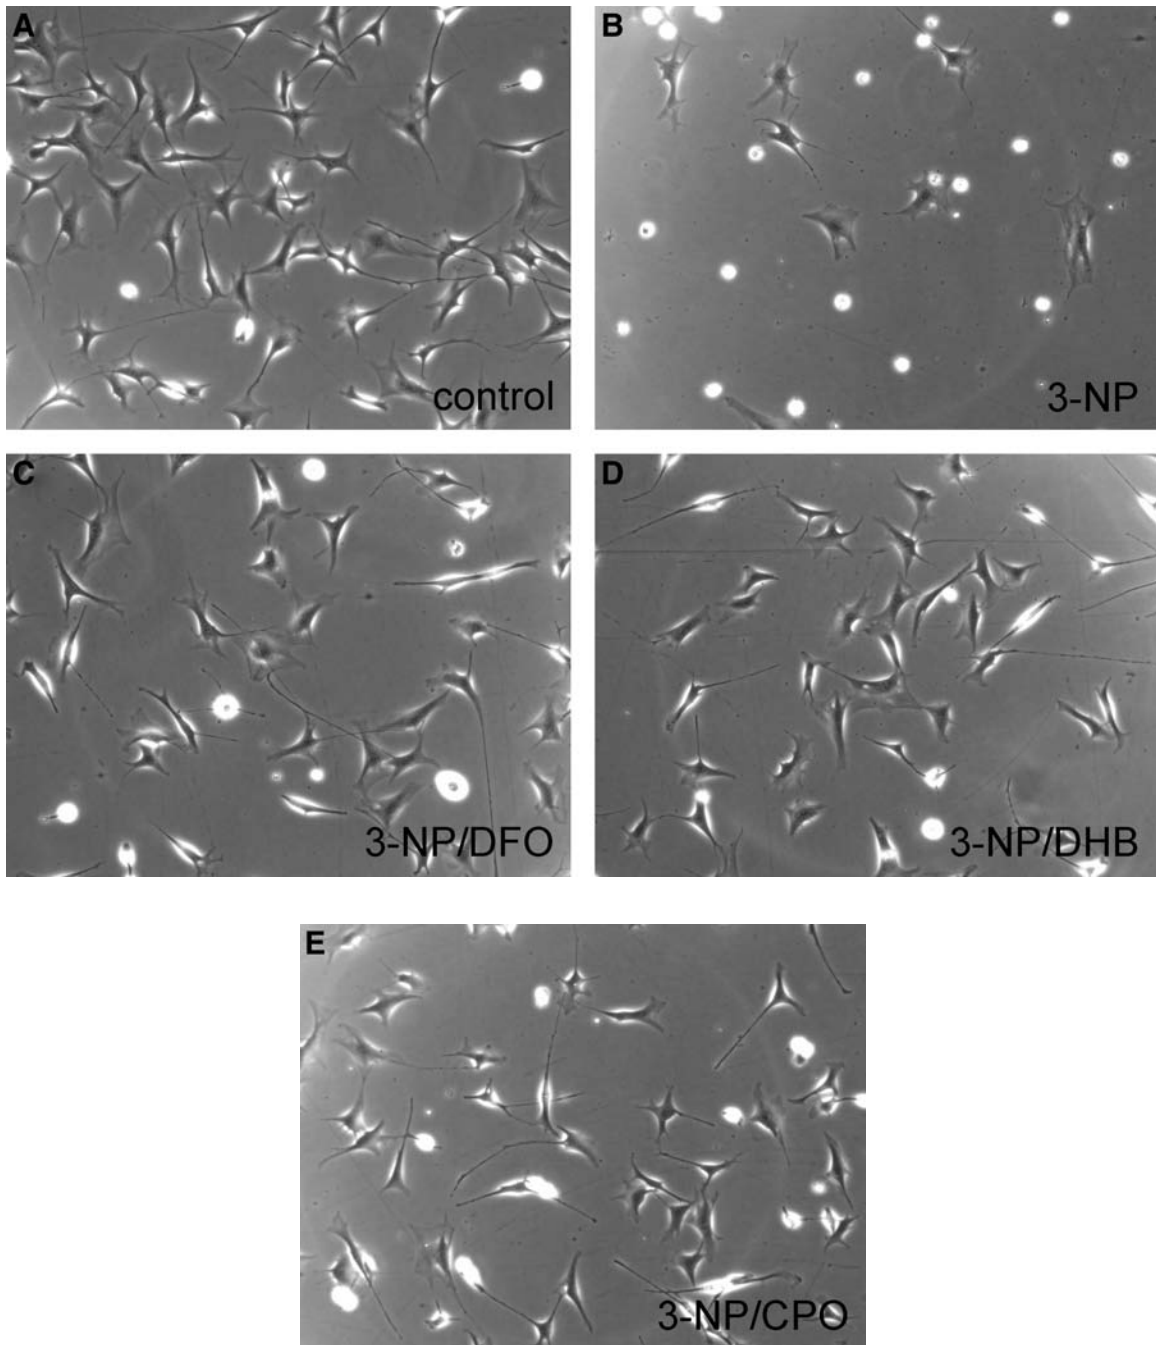

**SUPPLEMENTAL FIG. 3. Prolyl 4-hydroxylase inhibitors abrogate 3NP toxicity in Q111 striatal cells.** Q7 and Q111 striatal cells were pretreated with the indicated PHD inhibitors for 6 h and then exposed to 3-NP (10 mM) for an additional 24 h, after which cell survival was assessed by phase contrast microscopy. (A) untreated control cells, (B) 3-NP (10 mM), (C) 50  $\mu$ M desferrioxamine (DFO)+3-NP, (D) 50  $\mu$ M 3,4-dihydroxybenzoic acid (DHB)+3-NP, (E) 2.5  $\mu$ M ciclopirox (CPO)+3-NP.
